# Supplementary material for: Use of multi-criteria decision analysis (MCDA) to support decision-making during health emergencies: a scoping review
Source: Front Public Health. 2025 May 9;13:1584026. doi: 10.3389/fpubh.2025.1584026 (PMC12098513; doi:10.3389/fpubh.2025.1584026)
Supplement: SUPPLEMENTARY MATERIAL B — List of all articles included in the review with summary table of key quantitative characteristics. [file Table_2.XLSX]

## Sheet: included_list
study_id	authors	title	publication_year
4	Ekenberg, Love; Mihai, Adriana; Fasth, Tobias; Komendantova, Nadejda; Danielson, Mats	A Multi-Criteria Framework for Pandemic Response Measures.	2021
12	Ruggeri, Matteo; Cadeddu, Chiara; Roazzi, Paolo; Mandolini, Donatella; Grigioni, Mauro; Marchetti, Marco	Multi-Criteria-Decision-Analysis (MCDA) for the Horizon Scanning of Health Innovations an Application to COVID 19 Emergency.	2020
14	Chaker Masmoudi, Hend; Rhili, Amal; Zamali, Imen; Ben Hmid, Ahlem; Ben Ahmed, Melika; Khrouf, Myriam Razgallah	Multi-Criteria Decision Analysis to Prioritize People for COVID-19 Vaccination When Vaccines Are in Short Supply.	2022
18	Adabavazeh, Nazila; Nikbakht, Mehrdad; Tirkolaee, Erfan Babaee	Identifying and prioritizing resilient health system units to tackle the COVID-19 pandemic.	2023
40	De Nardo, Pasquale; Gentilotti, Elisa; Mazzaferri, Fulvia; Cremonini, Eleonora; Hansen, Paul; Goossens, Herman; Tacconelli, Evelina	Multi-Criteria Decision Analysis to prioritize hospital admission of patients affected by COVID-19 in low-resource settings with hospital-bed shortage.	2020
45	Ortíz-Barrios, Miguel; Jaramillo-Rueda, Natalia; Gul, Muhammet; Yucesan, Melih; Jiménez-Delgado, Genett; Alfaro-Saíz, Juan-José	A Fuzzy Hybrid MCDM Approach for Assessing the Emergency Department Performance during the COVID-19 Outbreak.	2023
53	Mehand, Massinissa Si; Millett, Piers; Al-Shorbaji, Farah; Roth, Cathy; Kieny, Marie Paule; Murgue, Bernadette	World Health Organization Methodology to Prioritize Emerging Infectious Diseases in Need of Research and Development.	2018
59	Hongoh, Valerie; Gosselin, Pierre; Michel, Pascal; Ravel, André; Waaub, Jean-Philippe; Campagna, Céline; Samoura, Karim	Criteria for the prioritization of public health interventions for climate-sensitive vector-borne diseases in Quebec.	2017
65	Yang, Zaoli; Li, Xin; Garg, Harish; Qi, Meng	Decision Support Algorithm for Selecting an Antivirus Mask over COVID-19 Pandemic under Spherical Normal Fuzzy Environment.	2020
67	Asfaw, Hizkel; Karuppannan, Shankar; Erduno, Tilahun; Almohamad, Hussein; Dughairi, Ahmed Abdullah Al; Al-Mutiry, Motrih; Abdo, Hazem Ghassan	Evaluation of Vulnerability Status of the Infection Risk to COVID-19 Using Geographic Information Systems (GIS) and Multi-Criteria Decision Analysis (MCDA): A Case Study of Addis Ababa City, Ethiopia.	2022
80	Thukral, Hanul; Shanmugasundaram, K.; Riyesh, T.; Kumar, Naveen; Singha, Harisankar; Gambhir, Dolly; Laura, Azad; Tiwari, Simmi; Gulati, Baldev R.	Multisectoral prioritization of zoonotic diseases in Haryana (India) using one health approach.	2023
93	Bouwknegt, Martijn; Devleesschauwer, Brecht; Graham, Heather; Robertson, Lucy J.; van der Giessen, Joke Wb	Prioritisation of food-borne parasites in Europe, 2016.	2018
107	Albahri, A. S.; Hamid, Rula A.; Albahri, O. S.; Zaidan, A. A.	Detection-based prioritisation: Framework of multi-laboratory characteristics for asymptomatic COVID-19 carriers based on integrated Entropy-TOPSIS methods.	2021
118	Roy, Melyssa; Hansen, Paul; Sullivan, Trudy; Ombler, Franz; Kiore, Mathew; Stapleton, Andrew; Carr, Craig	Rapid Development of a Tool for Prioritizing Patients with Coronavirus Disease 2019 for Intensive Care.	2021
127	Hongoh, Valerie; Michel, Pascal; Gosselin, Pierre; Samoura, Karim; Ravel, André; Campagna, Céline; Cissé, Hassane Djibrilla; Waaub, Jean-Philippe	Multi-Stakeholder Decision Aid for Improved Prioritization of the Public Health Impact of Climate Sensitive Infectious Diseases.	2016
131	Mehand, Massinissa Si; Al-Shorbaji, Farah; Millett, Piers; Murgue, Bernadette	The WHO R&D Blueprint: 2018 review of emerging infectious diseases requiring urgent research and development efforts.	2018
133	Klamer, Sofieke; Van Goethem, Nina; Thomas, Daniel; Duysburgh, Els; Braeye, Toon; Quoilin, Sophie	Prioritisation for future surveillance, prevention and control of 98 communicable diseases in Belgium: a 2018 multi-criteria decision analysis study.	2021
136	Young, Alyssa J.; Eaton, Will; Worges, Matt; Hiruy, Honelgn; Maxwell, Kolawole; Audu, Bala Mohammed; Marasciulo, Madeleine; Nelson, Charles; Tibenderana, James; Abeku, Tarekegn A.	A practical approach for geographic prioritization and targeting of insecticide-treated net distribution campaigns during public health emergencies and in resource-limited settings.	2022
140	Ozsahin, Dilber Uzun; Isa, Nuhu Abdulhaqq; Uzun, Berna; Ozsahin, Ilker	Quantifying holistic capacity response and healthcare resilience in tackling COVID-19: Assessment of country capacity by MCDM.	2024
158	Deveci, Muhammet; Krishankumar, Raghunathan; Gokasar, Ilgin; Tuna Deveci, Rumeysa	Prioritization of healthcare systems during pandemics using Cronbach's measure based fuzzy WASPAS approach.	2022
172	Cox, Ruth; Sanchez, Javier; Revie, Crawford W.	Multi-criteria decision analysis tools for prioritising emerging or re-emerging infectious diseases associated with climate change in Canada.	2013
210	Rahman, Md Rejaur; Islam, A. H. M. Hedayutul; Islam, Md Nazrul	Geospatial modelling on the spread and dynamics of 154 day outbreak of the novel coronavirus (COVID-19) pandemic in Bangladesh towards vulnerability zoning and management approaches.	2021
211	Soni, Prasoon; Gupta, Ithi; Singh, Pushpraj; Porte, Devendra Singh; Kumar, Dilip	GIS-based AHP analysis to recognize the COVID-19 concern zone in India.	2023
213	Bushira, Kedir Mohammed; Ongala, Jacob Otieno	Modeling Transmission Dynamics and Risk Assessment for COVID-19 in Namibia Using Geospatial Technologies.	2021
215	Aenishaenslin, Cécile; Hongoh, Valérie; Cissé, Hassane Djibrilla; Hoen, Anne Gatewood; Samoura, Karim; Michel, Pascal; Waaub, Jean-Philippe; Bélanger, Denise	Multi-criteria decision analysis as an innovative approach to managing zoonoses: results from a study on Lyme disease in Canada.	2013
246	Ding, Quanyu; Wang, Ying-Ming; Goh, Mark	An extended TODIM approach for group emergency decision making based on bidirectional projection with hesitant triangular fuzzy sets.	2021
251	Yang, Chih-Hao; Liu, Yen-Yu; Chiang, Chia-Hsin; Su, Ya-Wen	National IoMT platform strategy portfolio decision model under the COVID-19 environment: based on the financial and non-financial value view.	2022
297	Mohammed, Thura J.; Albahri, A. S.; Zaidan, A. A.; Albahri, O. S.; Al-Obaidi, Jameel R.; Zaidan, B. B.; Larbani, Moussa; Mohammed, R. T.; Hadi, Suha M.	Convalescent-plasma-transfusion intelligent framework for rescuing COVID-19 patients across centralised/decentralised telemedicine hospitals based on AHP-group TOPSIS and matching component.	2021
329	Fos, Peter J.; Miller, Danny L.; Amy, Brian W.; Zuniga, Miguel A.	Combining the benefits of decision science and financial analysis in public health management: a county-specific budgeting and planning model.	2004
344	Baltussen, Rob; Mikkelsen, Evelinn; Tromp, Noor; Hurtig, Annekarin; Byskov, Jens; Olsen, Oystein; Bærøe, Kristine; Hontelez, Jan A.; Singh, Jerome; Norheim, Ole F.	Balancing efficiency, equity and feasibility of HIV treatment in South Africa - development of programmatic guidance.	2013
611	Gouglas, D; Marsh, K	Prioritizing investments in new vaccines against epidemic infectious diseases: A multi-criteria decision analysis	2019
969	Wang, CN; Chou, CC; Hsu, HP; Nguyen, V; Nguyen, VT	Optimization Model for Selecting Temporary Hospital Locations During COVID-19 Pandemic	2022
1186	Otten, A; Fazil, A; Chemeris, A; Breadner, P; Ng, V	Prioritization of vector -borne diseases in Canada under current climate and projected climate change	2020
1326	Araz, OM	Integrating complex system dynamics of pandemic influenza with a multi-criteria decision making model for evaluating public health strategies	2013
1374	Sahdev, S; Kumar, M	Identification and Mapping of Dengue Epidemics using GIS-Based Multi-Criteria Decision Making. The Case of Delhi, India	2020
1418	Caylor, JP; Hammel, RJ	Utilization of Multi-Criteria Decision-Making for Emergency Management	2021
1467	Benmoussa, K; Hamdadou, D; Roukh, ZE	GIS-Based Multi-Criteria Decision-Support System and Machine Learning for Hospital Site Selection: Case Study Oran, Algeria	2022
1635	Erdogan, M	A fuzzy approach for prioritization of pharmacies to improve mask distribution process during COVID-19 pandemic-a pilot study for Istanbul	2023
1800	Carbajales-Dale, P; Annan-Coultas, D; Joseph, A; Thompson, M; Jafarifiroozabadi, R; Limber, SP; Holaday, B; Mihandoust, S	Using GIS to improve public health emergency response in rural areas during the COVID-19 crisis: A case study of South Carolina, US	2023
1801	Peker, I; Murat, ARI; Erol, I; Searcy, C	Leveraging blockchain in response to a pandemic through disaster risk management: an IF-MCDM framework	2023
1804	Albahri, AS; Al-Obaidi, JR; Zaidan, AA; Albahri, OS; Hamid, RA; Zaidan, BB; Alamoodi, AH; Hashim, M	Multi-Biological Laboratory Examination Framework for the Prioritization of Patients with COVID-19 Based on Integrated AHP and Group VIKOR Methods	2020
1897	Jeon, J; Suvitha, K; Arshad, NI; Kalaiselvan, S; Narayanamoorthy, S; Ferrara, M; Ahmadian, A	A probabilistic hesitant fuzzy MCDM approach to evaluate India's intervention strategies against the COVID-19 pandemic	2023
1944	Pan, JJ; Fan, RL; Zhang, HL; Gao, Y; Shu, ZQ; Chen, ZX	Investigating the Effectiveness of Government Public Health Systems against COVID-19 by Hybrid MCDM Approaches	2022
2047	Elmhadhbi, L; Karray, MH; Archimède, B; Otte, JN; Smith, B	Ontology-Driven Multicriteria Decision Support for Victim Evacuation	2022
2070	Liu, KN	GIS-based MCDM framework combined with coupled multi-hazard assessment for site selection of post-earthquake emergency medical service facilities in Wenchuan, China	2022
2141	Kheybari, S; Ishizaka, A; Salamirad, A	A new hybrid risk-averse best-worst method and portfolio optimization to select temporary hospital locations for Covid-19 patients	2023
2349	Alemdar, KD; Kaya, O; Codur, MY; Campisi, T; Tesoriere, G	Accessibility of Vaccination Centers in COVID-19 Outbreak Control: A GIS-Based Multi-Criteria Decision Making Approach	2021
2366	Khan, F; Ali, Y; Pamucar, D	A new fuzzy FUCOM-QFD approach for evaluating strategies to enhance the resilience of the healthcare sector to combat the COVID-19 pandemic	2022
2407	Boz, E; Çizmecioglu, S; Çalik, A	A Novel MDCM Approach for Sustainable Supplier Selection in Healthcare System in the Era of Logistics 4.0	2022
2421	Nguyen, PH; Tsai, JF; Dang, TT; Lin, MH; Pham, HA; Nguyen, KA	A Hybrid Spherical Fuzzy MCDM Approach to Prioritize Governmental Intervention Strategies against the COVID-19 Pandemic: A Case Study from Vietnam	2021
2520	Wyszynski, M; Grudzinski, M; Pokonieczny, K; Kaszubowski, M	The Assessment of COVID-19 Vulnerability Risk for Crisis Management	2022
2577	Mete, S; Yucesan, M; Gul, M; Ozceylan, E	An integrated hybrid MCDM approach to evaluate countries' COVID-19 risks	2023
2638	Samad, A; Zulqarnain, RM; Sermutlu, E; Ali, R; Siddique, I; Jarad, F; Abdeljawad, T	Selection of an Effective Hand Sanitizer to Reduce COVID-19 Effects and Extension of TOPSIS Technique Based on Correlation Coefficient under Neutrosophic Hypersoft Set	2021
2967	Gul, M; Yucesan, M	Hospital Preparedness Assessment against COVID-19 Pandemic: A Case Study in Turkish Tertiary Healthcare Services	2021
3232	Moheimani, A; Sheikh, R; Hosseini, SMH; Sana, SS	Assessing the agility of hospitals in disaster management: application of interval type-2 fuzzy Flowsort inference system	2021
3310	Pamucar, D; Zizovic, M; Marinkovic, D; Doljanica, D; Jovanovic, SV; Brzakovic, P	Development of a Multi-Criteria Model for Sustainable Reorganization of a Healthcare System in an Emergency Situation Caused by the COVID-19 Pandemic	2020
3359	Huang, SW; Liou, JJH; Chuang, HH; Tzeng, GH	Using a Modified VIKOR Technique for Evaluating and Improving the National Healthcare System Quality	2021
3386	Çakir, E; Tas, MA; Ulukan, Z	Spherical bipolar fuzzy weighted multi-facility location modeling for mobile COVID-19 vaccination clinics	2022
3449	Guillot, C.; Aenishaenslin, C.; Acheson, E.S.; Koffi, J.; Bouchard, C.; Leighton, P.A.	Spatial multi-criteria decision analysis for the selection of sentinel regions in tick-borne disease surveillance	2024
3540	Bilal, S.; İç, Y.T.	How COVID-19 pandemic influenced the countries? A value at risk based fuzzy TOPSIS approach using IF–THEN rules	2024
3636	George, T.K.; Nair, N.P.; Singh, A.K.; Dilesh Kumar, A.; Roy, A.D.; Mohan, V.N.; Kang, G.	Development of a Choice-framework for Covid vaccines in India using a multi-criteria decision analysis approach	2023
3815	Xidonas, P.; Steuer, R.	A multicriteria evaluation methodology for assessing the impact of COVID-19 in EU countries	2022
3876	Saner, H.S.; Yucesan, M.; Gul, M.	A Bayesian BWM and VIKOR-based model for assessing hospital preparedness in the face of disasters	2022
3931	Ağaç, G.; Şimşir, I.	OPTIMAL SITE SELECTION OF A PANDEMIC HOSPITAL USING MULTI-CRITERIA DECISION-MAKING APPROACH	2022
4040	Neogi, D.	Performance appraisal of select nations in mitigation of covid-19 pandemic using entropy based topsis method	2021
4045	Türkoğlu, S.P.; Tuzcu, S.E.	ASSESSING COUNTRY PERFORMANCES during the COVID-19 PANDEMIC: A STANDARD DEVIATION BASED RANGE of VALUE METHOD	2021
4053	Zizovic, M.; Pamucar, D.; Miljkovic, B.D.; Karan, A.R.	Multiple-criteria evaluation model for medical professionals assigned to temporary sars-cov-2 hospitals	2021
4064	Tsheten, T.; Clements, A.C.A.; Gray, D.J.; Wangdi, K.	Dengue risk assessment using multicriteria decision analysis: A case study of Bhutan	2021
4204	Roselli, L.R.P.; Frej, E.A.; Ferreira, R.J.P.; Alberti, A.R.; De Almeida, A.T.	Utility-Based Multicriteria Model for Screening Patients under the COVID-19 Pandemic	2020
4322	Samanlioglu, F.	Evaluation of Influenza Intervention Strategies in Turkey with Fuzzy AHP-VIKOR	2019
4840	Stevens, K.B.; Gilbert, M.; Pfeiffer, D.U.	Modeling habitat suitability for occurrence of highly pathogenic avian influenza virus H5N1 in domestic poultry in Asia: A spatial multicriteria decision analysis approach	2013

## Sheet: summary_cat_var
	Priority setting		Interventions		Prioritization of locations		Prioritization of pathogens		Prioritization of patinets		Other		Total
	n	%	n	%	n	%	n	%	n	%	n	%	n	%
Level of palication	13	1	17	1	21	1	9	1	7	1	4	1	71	1
Facility/institution	1	0.0769231	1	0.0588235	2	0.0952381	0	0	6	0.857143	1	0.25	11	0.15493
International	7	0.538462	2	0.117647	1	0.047619	3	0.333333	0	0	2	0.5	15	0.211268
National	4	0.307692	12	0.705882	6	0.285714	3	0.333333	1	0.142857	0	0	26	0.366197
Sub-national	1	0.0769231	2	0.117647	12	0.571429	3	0.333333	0	0	1	0.25	19	0.267606
Level of application
During/post-emergecny	5	0.384615	13	0.764706	17	0.809524	0	0	7	1	2	0.5	44	0.619718
Pre-emergecny	8	0.615385	4	0.235294	4	0.190476	9	1	0	0	2	0.5	27	0.380282
Alternatives identification
Literature review	2	0.25	5	0.294118	1	0.166667	3	0.375	1	1	0	0	12	0.285714
Expert consultations	0	0	3	0.176471	4	0.666667	2	0.25	0	0	1	0.5	10	0.238095
Literature review and expert consultations	0	0	2	0.117647	0	0	1	0.125	0	0	0	0	3	0.0714286
No information	6	0.75	7	0.411765	1	0.166667	2	0.25	0	0	1	0.5	17	0.404762
NA	5	-	0	-	15	-	1	-	6	-	2	-	29	-
Criteria identification
Literature review	7	0.538462	9	0.529412	5	0.238095	3	0.333333	2	0.285714	2	0.5	28	0.3944
Expert consultations	0	0	3	0.176471	4	0.190476	2	0.222222	1	0.142857	0	0	10	0.1408
Literature review and expert consultations	3	0.230769	1	0.0588235	7	0.333333	4	0.444444	2	0.285714	2	0.5	19	0.2676
No information	3	0.230769	4	0.235294	5	0.238095	0	0	2	0.285714	0	0	14	0.1972
Velue masurment
Objective data	11	0.846154	4	0.235294	16	0.761905	4	0.444444	6	0.857143	1	0.25	42	0.591549
Stakeholders inputs	2	0.153846	9	0.529412	5	0.238095	5	0.555556	1	0.142857	3	0.75	25	0.352113
Combined objective data and stakholders inputs	0	0	2	0.117647	0	0	0	0	0	0	0	0	2	0.028169
No information	0	0	2	0.117647	0	0	0	0	0	0	0	0	2	0.028169
Stakeholder engagment
At any stage (yes)	10	0.769231	14	0.823529	18	0.857143	8	0.888889	7	1	4	1	61	0.859155
Alternative identification (yes)	0	0	5	0.294118	4	0.190476	4	0.444444	1	0.142857	1	0.25	15	0.211268
Criteria identification (yes)	3	0.230769	5	0.294118	11	0.52381	8	0.888889	3	0.428571	2	0.5	32	0.450704
Performance masurment (yes)	2	0.153846	11	0.647059	5	0.238095	5	0.555556	1	0.142857	3	0.75	27	0.380282
Cretirea weighting (yes)	10	0.769231	12	0.705882	17	0.809524	8	0.888889	5	0.714286	3	0.75	55	0.774648
Different stackholders groups at different stages (yes)	0	0	0	0	1	0.047619	3	0.333333	2	0.285714	0	0	6	0.084507
Total number of staholders (median; range)	5	3 - 20	15	4 - 25	9	3 - 26	37	17 - 80	3	1 - 108	12	3 - 25	12.5	1 - 108
Stakeholder type
Experts (yes)	8	0.615385	12	0.705882	14	0.666667	8	0.888889	7	1	3	0.75	52	0.732394
Academia (yes)	3	0.230769	7	0.411765	6	0.285714	4	0.444444	3	0.428571	1	0.25	24	0.338028
Government (yes)	1	0.0769231	7	0.411765	6	0.285714	4	0.444444	2	0.285714	1	0.25	21	0.295775
NGOs (yes)	0	0	2	0.117647	0	0	2	0.222222	0	0	0	0	4	0.056338
Patients (yes)	0	0	1	0.0588235	0	0	2	0.222222	0	0	0	0	3	0.0422535
Methodology
Weights used (yes)	13	1	16	0.941176	21	1	9	1	6	0.857143	4	1	69	0.971831
Weighting method:
AHP	2	0.153846	5	0.294118	15	0.714286	3	0.333333	2	0.333333	0	0	27	0.385714
Objective	3	0.230769	3	0.176471	0	0	0	0	1	0.166667	0	0	7	0.1
Point allocation	0	0	2	0.117647	2	0.0952381	3	0.333333	0	0	0	0	7	0.1
BWM	2	0.153846	1	0.0588235	1	0.047619	0	0	0	0	1	0.25	5	0.0714286
Ordinal ranking	1	0.0769231	1	0.0588235	0	0	1	0.111111	0	0	1	0.25	4	0.0571429
TOPSIS	2	0.153846	1	0.0588235	0	0	0	0	0	0	0	0	3	0.0428571
No info	0	0	2	0.117647	0	0	1	0.111111	0	0	0	0	3	0.0428571
Direct rating	0	0	1	0.0588235	0	0	1	0.111111	0	0	1	0.25	3	0.0428571
PAPRIKA	0	0	0	0	0	0	0	0	3	0.5	0	0	3	0.0428571
Parwise comparison	1	0.0769231	0	0	1	0.047619	0	0	0	0	1	0.25	3	0.0428571
PROMETHEE	1	0.0769231	0	0	0	0	0	0	0	0	0	0	1	0.0142857
TODIM	0	0	1	0.0588235	0	0	0	0	0	0	0	0	1	0.0142857
LBWA-MACBETH	0	0	0	0	1	0.047619	0	0	0	0	0	0	1	0.0142857
IF-AHP and IF-DEMATEL	1	0.0769231	0	0	0	0	0	0	0	0	0	0	1	0.0142857
NDSL	0	0	0	0	1	0.047619	0	0	0	0	0	0	1	0.0142857
Aggregation method
Weighted sum	1	0.0769231	1	0.0588235	9	0.428571	5	0.555556	2	0.285714	2	0.5	20	0.28169
TOPSIS	4	0.307692	2	0.117647	1	0.047619	0	0	2	0.285714	0	0	9	0.126761
No info	0	0	2	0.117647	4	0.190476	0	0	1	0.142857	0	0	7	0.0985915
Other	2	0.153846	2	0.117647	0	0	0	0	0	0	2	0.5	6	0.084507
PROMETHEE	1	0.0769231	2	0.117647	1	0.047619	1	0.111111	0	0	0	0	5	0.0704225
VIKOR	1	0.0769231	2	0.117647	1	0.047619	0	0	1	0.142857	0	0	5	0.0704225
WASPAS	0	0	2	0.117647	1	0.047619	0	0	0	0	0	0	3	0.0422535
Awarage	0	0	0	0	1	0.047619	0	0	0	0	0	0	1	0.0140845
PROMETHEE and GAIA	0	0	0	0	0	0	1	0.111111	0	0	0	0	1	0.0140845
ZOGP	0	0	1	0.0588235	0	0	0	0	0	0	0	0	1	0.0140845
TOPSIS + VIKOR	1	0.0769231	0	0	0	0	0	0	0	0	0	0	1	0.0140845
TOPSIS + PROMETHEE II	1	0.0769231	0	0	0	0	0	0	0	0	0	0	1	0.0140845
Cut off velue on dominant criteria	0	0	0	0	1	0.047619	0	0	0	0	0	0	1	0.0140845
MAUT	0	0	0	0	0	0	0	0	1	0.142857	0	0	1	0.0140845
Multiplicative	1	0.0769231	0	0	0	0	0	0	0	0	0	0	1	0.0140845
TODIM	0	0	1	0.0588235	0	0	0	0	0	0	0	0	1	0.0140845
M-MACBETH	0	0	0	0	0	0	1	0.111111	0	0	0	0	1	0.0140845
SpNoFBM, SpFN with NFN.	0	0	1	0.0588235	0	0	0	0	0	0	0	0	1	0.0140845
COPRAS	1	0.0769231	0	0	0	0	0	0	0	0	0	0	1	0.0140845
SBWAM	0	0	0	0	1	0.047619	0	0	0	0	0	0	1	0.0140845
AHP	0	0	0	0	0	0	1	0.111111	0	0	0	0	1	0.0140845
Range of Value (ROV) Method	0	0	1	0.0588235	0	0	0	0	0	0	0	0	1	0.0140845
RAFSI	0	0	0	0	1	0.047619	0	0	0	0	0	0	1	0.0140845
Uncertanty adressed (yes)	6	0.461538	12	0.705882	14	0.666667	8	0.888889	3	0.428571	3	0.75	46	0.647887
Uncertatny method:
Fuzzy	2	0.333333	5	0.416667	3	0.214286	0	0	0	0	0	0	10	0.217391
Fuzzy and sensativity	1	0.166667	3	0.25	2	0.142857	0	0	0	0	1	0.333333	7	0.152174
Objective validation	1	0.166667	1	0.0833333	1	0.0714286	0	0	2	0.666667	0	0	5	0.108696
Sensativity analysis	2	0.333333	3	0.25	8	0.571429	8	1	1	0.333333	2	0.666667	24	0.521739
Sensativity analyis dirrected at:
Parameter	1	0.5	0	0	2	0.25	1	0.125	0	0	0	0	4	0.166667
Weights	1	0.5	3	1	6	0.75	5	0.625	1	1	1	0.5	17	0.708333
Weights and parameters	0	0	0	0	0	0	2	0.25	0	0	1	0.5	3	0.125
Criteria type:
Population / BoD	8	0.228571	5	0.0714286	12	0.226415	9	0.204545	7	0.7	1	0.0714286	42	0.185841
Health system	8	0.228571	7	0.1	7	0.132075	6	0.136364	1	0.1	2	0.142857	31	0.137168
Socieity	3	0.0857143	13	0.185714	5	0.0943396	7	0.159091	0	0	3	0.214286	31	0.137168
Cost / ecomomic	2	0.0571429	13	0.185714	4	0.0754717	5	0.113636	0	0	2	0.142857	26	0.115044
Environment and geogrphy	2	0.0571429	2	0.0285714	16	0.301887	4	0.0909091	0	0	1	0.0714286	25	0.110619
Threat caracterisitcs	3	0.0857143	6	0.0857143	3	0.0566038	9	0.204545	0	0	1	0.0714286	22	0.0973451
Feasability	4	0.114286	9	0.128571	4	0.0754717	1	0.0227273	0	0	2	0.142857	20	0.0884956
Ethics and equaty	2	0.0571429	5	0.0714286	1	0.0188679	3	0.0681818	2	0.2	1	0.0714286	14	0.0619469
Effectivness and safety	2	0.0571429	10	0.142857	1	0.0188679	0	0	0	0	1	0.0714286	14	0.0619469
Global Indexes	1	0.0285714	0	0	0	0	0	0	0	0	0	0	1	0.00442478

## Sheet: summary_num_var
Alternatives
	Median	Min	Max	Q1	Q3
Priority setting	22	3	215	11	30
Interventions	8	3	27	4	15
Prioritization of locations	20	3	775	8.5	35.5
Prioritization of pathogens	13	5	98	9	24
Prioritization of patinets	10	1	80	7	10.5
Other	12.5	2	82	5.75	34
Total	13	1	775	6	27
Criteria
	Median	Min	Max	Q1	Q3
Priority setting	8	4	40	6	10
Interventions	8	3	16	5	10
Prioritization of locations	8	3	15	4.5	11.5
Prioritization of pathogens	13	5	98	9	24
Prioritization of patinets	8	5	11	7.5	9
Other	6	5	20	5	10.25
Total	8	3	98	5	12
